# Supplementary material
Source: Springer Nature journal article supplement (https://www.springermedizin.de/resource/supplementary/12902_2013_258_MOESM3_ESM.pdf/9515890)

A. Benign tissues

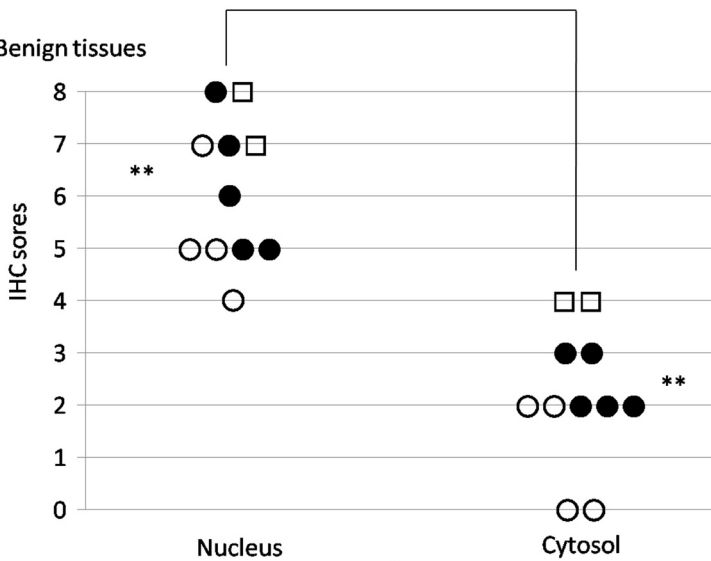

B. Malignant tissues

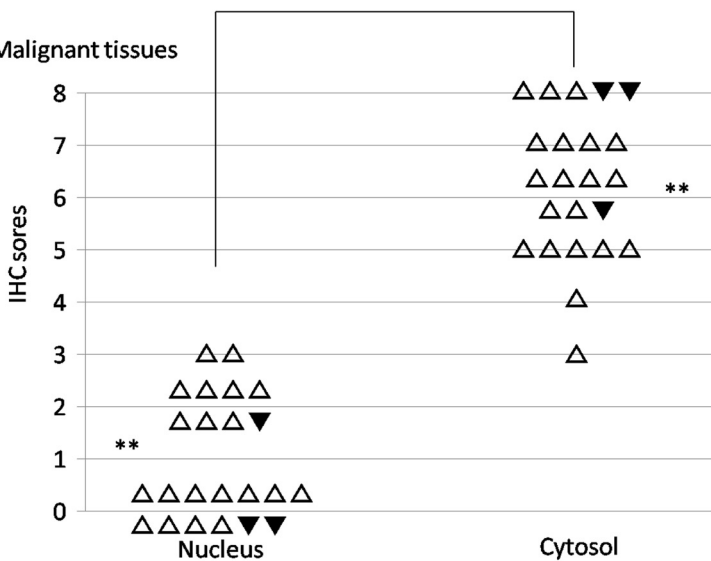

Supplement: MOESM3 [file 9515890]
